# Supplementary material for: Analysis of genetic variants for different horn phenotypes and their inheritance in Icelandic sheep
Source: Copernicus journal article supplement (doi:10.5194/aab-67-237-2024), 2024-06-05
Supplement: Supplementary file [file aab-67-237-2024-supplement.pdf]

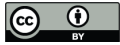

*Supplement of*

## **Analysis of genetic variants for different horn phenotypes and their inheritance in Icelandic sheep**

**Rebecca Simon et al.**

*Correspondence to:* Gesine Lühken ([gesine.luehken@agr.uni-giessen.de](mailto:gesine.luehken@agr.uni-giessen.de))

The copyright of individual parts of the supplement might differ from the article licence.

## Supplementary material

**Table S1 Genotyping results for the previously published SNPs OAR10\_29 461 968 and OAR10\_29 462 010 that showed an influence on horn length and form in Chinese breeds (Pan et al. 2018) in selected Icelandic sheep with the displayed horn phenotypes. Please note that for the latter SNP just the C allele was present in the analysed sample set.**

| Horn phenotype                | Sex    | OAR10_29 461 968 |       |       | OAR10_29 462 010 |
|-------------------------------|--------|------------------|-------|-------|------------------|
|                               |        | C / C            | T / C | T / T | C / C            |
| polled                        | female | 1                | 1     |       | 2                |
|                               | male   |                  |       |       |                  |
| normal horned                 | female |                  | 1     | 1     | 2                |
|                               | male   |                  | 3     | 4     | 7                |
|                               | N/A    |                  |       | 1     | 1                |
| scurs                         | female |                  | 6     |       | 6                |
|                               | male   |                  | 3     |       | 3                |
| oval horns                    | female |                  |       | 1     | 1                |
|                               | male   | 2                | 9     |       | 11               |
| polycerate (4-6 horns)        | female |                  |       | 1     | 1                |
|                               | male   |                  | 1     | 1     | 2                |
| polled polycerate (4-6 horns) | female |                  | 1     | 1     | 2                |
|                               | male   |                  | 1     |       | 1                |
|                               | N/A    |                  | 1     |       | 1                |

**Table S2 Horn status of the offspring from various matings on farm N°1, indicating which horn status derived from which parent combination. Please note that for some parents no detailed horn information was available, indicated by horns (?).**

| Mating of different horn status parents |   |              | Horn status progeny |               |       |            |
|-----------------------------------------|---|--------------|---------------------|---------------|-------|------------|
|                                         |   |              | Polled              | Normal horned | Scurs | Oval horns |
| polled                                  | X | polled       | 12                  |               | 2     | 1          |
| polled                                  | X | scurs        | 5                   |               |       | 3          |
| polled                                  | X | normal horns | 2                   | 4             |       | 2          |
| polled                                  | X | oval horns   | 8                   |               | 4     |            |
| normal horns                            | X | normal horns | 1                   |               |       | 1          |
| normal horns                            | X | oval horns   |                     | 1             |       |            |
| normal horns                            | X | scurs        |                     | 2             |       |            |
| oval horns                              | X | oval horns   | 1                   |               | 1     | 2          |
| oval horns                              | X | scurs        | 3                   |               |       | 3          |
| polled                                  | X | horns (?)    | 2                   |               |       |            |
| scurs                                   | X | horns (?)    |                     |               | 1     |            |
| ?                                       | X | polled       | 1                   |               |       |            |
| ?                                       | X | horns (?)    |                     |               | 1     | 1          |
| ?                                       | X | scurs        |                     | 2             |       |            |
| ?                                       | X | ?            | 3                   |               | 1     |            |

**Table S3 Details on all Icelandic sheep used for the analysis. Please note that the individuals used for genotyping of the different variants are marked.**

| farm | lab N°    | sex    | horn status | details on horn from or number | details on mothers horn phenotypes | details on fathers horn phenotypes | RXFP2 insertion (Wiedemar and Drögemüller (2015)) | OAR10_29458450 (Dujivesteijn et al. (2018)) | OAR10_29461968 ("Pan5", Pan et al. (2018)) | OAR10_29462010 ("Pan6", Pan et al. (2018)) | HOXD1 deletion (Allais-Bonnet et al. (2021)) |
|------|-----------|--------|-------------|--------------------------------|------------------------------------|------------------------------------|---------------------------------------------------|---------------------------------------------|--------------------------------------------|--------------------------------------------|----------------------------------------------|
| N°1  | 20224504  | female | horns       | normal, 2                      | scurs                              | unkown                             | ✓                                                 | ✓                                           | ✓                                          | ✓                                          | ✓                                            |
| N°1  | 20213679  | female | horns       | normal, 2                      | scurs                              | horns, normal, 2                   | ✓                                                 | ✓                                           | ✓                                          | ✓                                          | ✓                                            |
| N°1  | 20223748  | male   | horns       | normal, 2                      | scurs                              | unkown                             | ✓                                                 | ✓                                           | ✓                                          | ✓                                          | ✓                                            |
| N°1  | 20213677  | male   | horns       | normal, 2                      | horns, oval                        | horns, normal, 2                   | ✓                                                 | ✓                                           | ✓                                          | ✓                                          | ✓                                            |
| N°1  | 20223678  | male   | horns       | normal, 2                      | scurs                              | horns, normal, 2                   | ✓                                                 | ✓                                           | ✓                                          | ✓                                          |                                              |
| N°1  | 20213683  | male   | horns       | normal, 2                      | polled                             | horns, normal, 2                   | ✓                                                 | ✓                                           | ✓                                          | ✓                                          |                                              |
| N°1  | 20213682  | male   | horns       | normal, 2                      | polled                             | horns, normal, 2                   | ✓                                                 | ✓                                           | ✓                                          | ✓                                          |                                              |
| N°1  | 20213680  | male   | horns       | normal, 2                      | polled                             | horns, normal, 2                   | ✓                                                 | ✓                                           | ✓                                          | ✓                                          |                                              |
| N°1  | 20213681  | male   | horns       | normal, 2                      | polled                             | horns, normal, 2                   | ✓                                                 | ✓                                           | ✓                                          | ✓                                          |                                              |
| N°1  | 20214213  | female | horns       | oval                           | unkown                             | horns, no details                  | ✓                                                 |                                             | ✓                                          | ✓                                          | ✓                                            |
| N°1  | 20223773  | male   | horns       | oval                           | polled                             | polled                             | ✓                                                 |                                             | ✓                                          | ✓                                          | ✓                                            |
| N°1  | 20223749  | male   | horns       | oval                           | scurs                              | polled                             | ✓                                                 |                                             | ✓                                          | ✓                                          |                                              |
| N°1  | 20223764  | male   | horns       | oval                           | scurs                              | unkown                             | ✓                                                 |                                             | ✓                                          | ✓                                          |                                              |
| N°1  | 20223776  | male   | horns       | oval                           | horns, oval                        | horns, oval                        | ✓                                                 |                                             | ✓                                          | ✓                                          |                                              |
| N°1  | 20223771  | male   | horns       | oval                           | horns, oval                        | horns, oval                        | ✓                                                 |                                             | ✓                                          | ✓                                          |                                              |
| N°1  | 20223766  | male   | horns       | oval                           | scurs                              | horns, oval                        | ✓                                                 |                                             | ✓                                          | ✓                                          |                                              |
| N°1  | 20223751  | male   | horns       | oval                           | scurs                              | horns, oval                        | ✓                                                 |                                             | ✓                                          | ✓                                          |                                              |
| N°1  | 20223768  | male   | horns       | oval                           | scurs                              | horns, oval                        | ✓                                                 |                                             | ✓                                          | ✓                                          |                                              |
| N°1  | 20211430  | male   | horns       | oval                           | polled                             | horns, normal, 2                   | ✓                                                 |                                             | ✓                                          | ✓                                          |                                              |
| N°1  | 20211431  | male   | horns       | oval                           | polled                             | horns, normal, 2                   | ✓                                                 |                                             | ✓                                          | ✓                                          |                                              |
| N°1  | 20223745  | male   | horns       | oval                           | horns, normal, 2                   | horns, normal, 2                   | ✓                                                 | ✓                                           | ✓                                          | ✓                                          |                                              |
| N°1  | deceased* | male   | horns       | oval                           | scurs                              | polled                             | ✓                                                 |                                             |                                            |                                            |                                              |
| N°1  | 20213950  | female | polled      |                                | polled                             | horns, no details                  | ✓                                                 | ✓                                           |                                            |                                            |                                              |
| N°1  | 20213949  | female | polled      |                                | scurs                              | polled                             | ✓                                                 | ✓                                           |                                            |                                            |                                              |
| N°1  | 20213956  | female | polled      |                                | unkown                             | unkown                             | ✓                                                 | ✓                                           |                                            |                                            |                                              |
| N°1  | 20213955  | female | polled      |                                | unkown                             | unkown                             | ✓                                                 | ✓                                           |                                            |                                            |                                              |
| N°1  | 20223750  | female | polled      |                                | polled                             | polled                             | ✓                                                 | ✓                                           |                                            |                                            | ✓                                            |
| N°1  | 20223756  | female | polled      |                                | scurs                              | polled                             | ✓                                                 | ✓                                           |                                            |                                            | ✓                                            |
| N°1  | 20213954  | female | polled      |                                | polled                             | polled                             | ✓                                                 | ✓                                           |                                            |                                            |                                              |
| N°1  | 20223757  | female | polled      |                                | polled                             | polled                             | ✓                                                 | ✓                                           |                                            |                                            |                                              |
| N°1  | 20223775  | female | polled      |                                | polled                             | polled                             | ✓                                                 | ✓                                           |                                            |                                            |                                              |
| N°1  | 20224503  | female | polled      |                                | polled                             | polled                             | ✓                                                 | ✓                                           |                                            |                                            |                                              |
| N°1  | 20223760  | female | polled      |                                | polled                             | polled                             | ✓                                                 | ✓                                           |                                            |                                            |                                              |
| N°1  | 20223767  | female | polled      |                                | scurs                              | horns, oval                        | ✓                                                 | ✓                                           |                                            |                                            |                                              |
| N°1  | 20223772  | female | polled      |                                | polled                             | horns, oval                        | ✓                                                 | ✓                                           |                                            |                                            |                                              |
| N°1  | 20223765  | female | polled      |                                | polled                             | horns, oval                        | ✓                                                 | ✓                                           |                                            |                                            |                                              |
| N°1  | 20223774  | female | polled      |                                | polled                             | horns, oval                        | ✓                                                 | ✓                                           |                                            |                                            |                                              |
| N°1  | 20223779  | female | polled      |                                | polled                             | horns, oval                        | ✓                                                 | ✓                                           |                                            |                                            |                                              |
| N°1  | 20223753  | female | polled      |                                | polled                             | polled                             | ✓                                                 | ✓                                           |                                            |                                            |                                              |
| N°1  | 20223763  | female | polled      |                                | polled                             | polled                             | ✓                                                 | ✓                                           |                                            |                                            |                                              |
| N°1  | 20223755  | female | polled      |                                | scurs                              | horns, oval                        | ✓                                                 | ✓                                           |                                            |                                            |                                              |
| N°1  | 20223747  | female | polled      |                                | scurs                              | horns, oval                        | ✓                                                 | ✓                                           |                                            |                                            |                                              |
| N°1  | 20223770  | female | polled      |                                | horns                              | polled                             | ✓                                                 | ✓                                           |                                            |                                            |                                              |
| N°1  | 20213952  | female | polled      |                                | polled                             | unkown                             | ✓                                                 | ✓                                           |                                            |                                            |                                              |

**Table S3 Details on all Icelandic sheep used for the analysis. Please note that the individuals used for genotyping of the different variants are marked. (continued)**

| farm | lab N°    | sex     | horn status | details on horn from or number | details on mothers horn phenotypes | details on fathers horn phenotypes | RXFP2 insertion (Wiedemar and Drögemüller (2015)) | OAR10_29458450 (Dujvesteijn et al. (2018)) | OAR10_29461968 ("Pan5", Pan et al. (2018)) | OAR10_29462010 ("Pan6", Pan et al. (2018)) | HOXD1 deletion (Allais-Bonnet et al. (2021)) |
|------|-----------|---------|-------------|--------------------------------|------------------------------------|------------------------------------|---------------------------------------------------|--------------------------------------------|--------------------------------------------|--------------------------------------------|----------------------------------------------|
| N°1  | 20223762  | female  | polled      |                                | polled                             | polled                             | ✓                                                 | ✓                                          |                                            |                                            |                                              |
| N°1  | 20211428  | female  | polled      |                                | polled                             | horns, normal, 2                   | ✓                                                 | ✓                                          |                                            |                                            |                                              |
| N°1  | 20211429  | female  | polled      |                                | polled                             | horns, normal, 2                   | ✓                                                 | ✓                                          |                                            |                                            |                                              |
| N°1  | 20223746  | female  | polled      |                                | horns, normal, 2                   | horns, normal, 2                   | ✓                                                 | ✓                                          | ✓                                          | ✓                                          | ✓                                            |
| N°1  | deceased* | female  | polled      |                                | horns, oval                        | polled                             | ✓                                                 |                                            |                                            |                                            |                                              |
| N°1  | deceased* | female  | polled      |                                | horns, oval                        | polled                             | ✓                                                 |                                            |                                            |                                            |                                              |
| N°1  | deceased* | female  | polled      |                                | scurs                              | polled                             | ✓                                                 |                                            |                                            |                                            |                                              |
| N°1  | deceased* | female  | polled      |                                | polled                             | polled                             | ✓                                                 |                                            |                                            |                                            |                                              |
| N°1  | deceased* | female  | polled      |                                | horns, oval                        | horns, oval                        | ✓                                                 |                                            |                                            |                                            |                                              |
| N°1  | deceased* | female  | polled      |                                | scurs                              | polled                             | ✓                                                 |                                            |                                            |                                            |                                              |
| N°1  | 20223758  | male    | polled      |                                | polled                             | polled                             | ✓                                                 | ✓                                          |                                            |                                            | ✓                                            |
| N°1  | 20223754  | male    | polled      |                                | scurs                              | polled                             | ✓                                                 | ✓                                          |                                            |                                            | ✓                                            |
| N°1  | 20223777  | male    | polled      |                                | polled                             | horns, oval                        | ✓                                                 | ✓                                          |                                            |                                            |                                              |
| N°1  | 20223778  | male    | polled      |                                | polled                             | horns, oval                        | ✓                                                 | ✓                                          |                                            |                                            |                                              |
| N°1  | deceased* | male    | polled      |                                | polled                             | polled                             | ✓                                                 |                                            |                                            |                                            |                                              |
| N°1  | 20221644  | male    | polled      |                                | unkown                             | unkown                             | ✓                                                 | ✓                                          |                                            |                                            |                                              |
| N°1  | 20222931  | female  | scurs       |                                | polled                             | horns, no details                  | ✓                                                 |                                            | ✓                                          | ✓                                          |                                              |
| N°1  | 20213951  | female  | scurs       |                                | unkown                             | horns, no details                  | ✓                                                 |                                            | ✓                                          | ✓                                          |                                              |
| N°1  | 20214317  | female  | scurs       |                                | unkown                             | unkown                             | ✓                                                 |                                            | ✓                                          | ✓                                          |                                              |
| N°1  | 20220500  | female  | scurs       |                                | polled                             | horns                              | ✓                                                 |                                            | ✓                                          | ✓                                          | ✓                                            |
| N°1  | 20223759  | female  | scurs       |                                | polled                             | horns                              | ✓                                                 |                                            | ✓                                          | ✓                                          |                                              |
| N°1  | 20223744  | female  | scurs       |                                | scurs                              | horns, normal, 2                   | ✓                                                 | ✓                                          | ✓                                          | ✓                                          | ✓                                            |
| N°1  | 20223761  | male    | scurs       |                                | horns, oval                        | horns, oval                        | ✓                                                 |                                            | ✓                                          | ✓                                          | ✓                                            |
| N°1  | 20223769  | male    | scurs       |                                | polled                             | polled                             | ✓                                                 |                                            | ✓                                          |                                            |                                              |
| N°1  | 20223752  | male    | scurs       |                                | polled                             | horns, oval                        | ✓                                                 |                                            | ✓                                          |                                            |                                              |
| N°1  | deceased* | male    | scurs       |                                | polled                             | polled                             | ✓                                                 |                                            |                                            |                                            |                                              |
| N°2  | 20223040  | male    | horns       | polycerate origin, unknown     |                                    |                                    | ✓                                                 |                                            |                                            |                                            | ✓                                            |
| N°2  | 20223041  | female  | horns       | polycerate origin, 2           |                                    |                                    | ✓                                                 |                                            |                                            |                                            | ✓                                            |
| N°2  | 20223050  | female  | horns       | polycerate origin, 2           |                                    |                                    | ✓                                                 |                                            |                                            |                                            | ✓                                            |
| N°2  | 20223059  | female  | horns       | polycerate origin, 2           |                                    |                                    | ✓                                                 |                                            |                                            |                                            | ✓                                            |
| N°2  | 20223035  | male    | horns       | polycerate origin, 2           |                                    |                                    | ✓                                                 | ✓                                          |                                            |                                            | ✓                                            |
| N°2  | 20223036  | male    | horns       | polycerate origin, 2           |                                    |                                    | ✓                                                 | ✓                                          |                                            |                                            | ✓                                            |
| N°2  | 20223037  | male    | horns       | polycerate origin, 2           |                                    |                                    | ✓                                                 |                                            |                                            |                                            | ✓                                            |
| N°2  | 20223038  | male    | horns       | polycerate origin, 2           |                                    |                                    | ✓                                                 |                                            |                                            |                                            | ✓                                            |
| N°2  | 20223039  | male    | horns       | polycerate origin, 2           |                                    |                                    | ✓                                                 |                                            |                                            |                                            | ✓                                            |
| N°2  | 20223044  | male    | horns       | polycerate origin, 2           |                                    |                                    | ✓                                                 |                                            |                                            |                                            | ✓                                            |
| N°2  | 20223045  | male    | horns       | polycerate origin, 2           |                                    |                                    | ✓                                                 |                                            |                                            |                                            | ✓                                            |
| N°2  | 20223046  | male    | horns       | polycerate origin, 2           |                                    |                                    | ✓                                                 |                                            |                                            |                                            | ✓                                            |
| N°2  | 20223049  | male    | horns       | polycerate origin, 2           |                                    |                                    | ✓                                                 |                                            |                                            |                                            | ✓                                            |
| N°2  | 20223058  | male    | horns       | polycerate origin, 2           |                                    |                                    | ✓                                                 |                                            |                                            |                                            | ✓                                            |
| N°2  | 20223062  | male    | horns       | polycerate origin, 2           |                                    |                                    | ✓                                                 |                                            |                                            |                                            | ✓                                            |
| N°2  | 20223063  | male    | horns       | polycerate origin, 2           |                                    |                                    | ✓                                                 | ✓                                          |                                            |                                            | ✓                                            |
| N°2  | 20223061  | unknown | horns       | polycerate origin, 2           |                                    |                                    | ✓                                                 | ✓                                          | ✓                                          | ✓                                          | ✓                                            |
| N°2  | 20223053  | female  | horns       | polycerate origin, 2           |                                    |                                    | ✓                                                 | ✓                                          |                                            |                                            | ✓                                            |

**Table S3 Details on all Icelandic sheep used for the analysis. Please note that the individuals used for genotyping of the different variants are marked. (continued)**

| farm | lab N°   | sex     | horn status | details on horn from or number | details on mothers horn phenotypes | details on fathers horn phenotypes | RXFP2 insertion (Wiedemar and Drögemüller (2015)) | OAR10_29458450 (Dujvesteijn et al. (2018)) | OAR10_29461968 ("Pan5", Pan et al. (2018)) | OAR10_29462010 ("Pan6", Pan et al. (2018)) | HOXD1 deletion (Allais-Bonnet et al. (2021)) |
|------|----------|---------|-------------|--------------------------------|------------------------------------|------------------------------------|---------------------------------------------------|--------------------------------------------|--------------------------------------------|--------------------------------------------|----------------------------------------------|
| N°2  | 20223054 | female  | horns       | polycerate origin, 2           |                                    |                                    | ✓                                                 | ✓                                          |                                            |                                            | ✓                                            |
| N°2  | 20223060 | male    | horns       | polycerate origin, 4           |                                    |                                    | ✓                                                 | ✓                                          | ✓                                          | ✓                                          | ✓                                            |
| N°2  | 20221862 | unknown | horns       | polycerate origin, 4           |                                    |                                    | ✓                                                 |                                            |                                            |                                            |                                              |
| N°2  | 20211413 | female  | horns       | polycerate origin, 6           |                                    |                                    | ✓                                                 |                                            | ✓                                          | ✓                                          | ✓                                            |
| N°2  | 20223051 | male    | horns       | polycerate origin, 4           |                                    |                                    | ✓                                                 | ✓                                          | ✓                                          | ✓                                          | ✓                                            |
| N°2  | 20223042 | female  | polled      | polycerate origin, 2           |                                    |                                    | ✓                                                 |                                            |                                            |                                            | ✓                                            |
| N°2  | 20223043 | female  | polled      | polycerate origin, 2           |                                    |                                    | ✓                                                 |                                            |                                            |                                            | ✓                                            |
| N°2  | 20223048 | female  | polled      | polycerate origin, 2           |                                    |                                    | ✓                                                 |                                            |                                            |                                            | ✓                                            |
| N°2  | 20223047 | male    | polled      | polycerate origin, 2           |                                    |                                    | ✓                                                 |                                            |                                            |                                            | ✓                                            |
| N°2  | 20223055 | male    | polled      | polycerate origin, 2           |                                    |                                    | ✓                                                 |                                            |                                            |                                            | ✓                                            |
| N°2  | 20223052 | female  | polled      | polycerate origin, 2           |                                    |                                    | ✓                                                 | ✓                                          | ✓                                          | ✓                                          | ✓                                            |
| N°2  | 20223034 | female  | polled      | polycerate origin, 4           |                                    |                                    | ✓                                                 | ✓                                          | ✓                                          | ✓                                          | ✓                                            |
| N°2  | 20223057 | female  | polled      | polycerate origin, 4           |                                    |                                    | ✓                                                 | ✓                                          | ✓                                          | ✓                                          | ✓                                            |
| N°2  | 20223056 | male    | polled      | polycerate origin, 4           |                                    |                                    | ✓                                                 | ✓                                          | ✓                                          | ✓                                          | ✓                                            |
| N°2  | 20223033 | unknown | polled      | polycerate origin, 4 (scurs?)  |                                    |                                    | ✓                                                 | ✓                                          | ✓                                          | ✓                                          | ✓                                            |

\* no DNA samples available
